# Supplementary material for: Differences in circulating microRNA signature in Prader–Willi syndrome and non-syndromic obesity
Source: PubMed Central journal article supplement — Endocr Connect. 2018 Oct 8;7(12):1262–74. doi: 10.1530/EC-18-0329 (PMC6240145; doi:10.1530/ec-18-0329), 2018-10-08
Supplement: EC-18-0329-t001.pdf [file EC-18-0329-t001.pdf]

**Table S1.** Circulating miRNA expression in OB and PWS subjects

| II quantile serum miRNAs |                     |                      |
|--------------------------|---------------------|----------------------|
| miRNA ID                 | Log2 avg. signal OB | Log2 avg. Signal PWS |
| hsa-miR-27a-3p           | 2.11 ± 1.73         | 1.19 ± 1.19          |
| hsa-let-7d-5p            | 2.02 ± 1.58         | 1.44 ± 0.91          |
| hsa-miR-342-3p           | 1.99 ± 1.50         | 1.28 ± 0.98          |
| hsa-miR-15b-5p           | 1.96 ± 1.63         | 1.23 ± 1.05          |
| hsa-miR-126-3p           | 1.96 ± 1.43         | 1.22 ± 1.21          |
| hsa-miR-652-3p           | 1.83 ± 1.46         | 1.25 ± 0.77          |
| hsa-miR-1228-3p          | 1.76 ± 0.26         | 1.60 ± 0.53          |
| hsa-miR-143-3p           | 1.62 ± 1.08         | 1.15 ± 0.79          |
| hsa-let-7a-5p            | 1.56 ± 1.21         | 1.06 ± 0.64          |
| hsa-miR-940              | 1.52 ± 0.44         | 1.49 ± 0.40          |
| hsa-let-7i-5p            | 1.49 ± 0.75         | 1.26 ± 0.96          |
| hsa-miR-20b-5p           | 1.48 ± 1.09         | 1.14 ± 0.94          |
| hsa-miR-181a-5p          | 1.48 ± 0.70         | 1.12 ± 0.49          |
| hsa-miR-6836-3p          | 1.48 ± 0.47         | 1.32 ± 0.41          |
| hsa-miR-18a-5p           | 1.46 ± 0.90         | 1.10 ± 0.65          |
| hsa-miR-210-5p           | 1.46 ± 0.49         | 1.37 ± 0.32          |
| hsa-miR-6796-5p          | 1.45 ± 0.29         | 1.32 ± 0.29          |
| hsa-miR-106b-3p          | 1.44 ± 0.65         | 0.92 ± 0.55          |
| hsa-miR-6796-3p          | 1.40 ± 0.27         | 1.30 ± 0.34          |
| hsa-miR-1910-5p          | 1.39 ± 0.35         | 1.24 ± 0.45          |
| hsa-miR-1260b            | 1.38 ± 0.36         | 1.14 ± 0.31          |
| hsa-miR-4701-5p          | 1.37 ± 0.47         | ND                   |
| hsa-miR-6798-3p          | 1.37 ± 0.44         | 1.29 ± 0.29          |
| hsa-miR-671-5p           | 1.37 ± 0.38         | 1.47 ± 0.36          |
| hsa-miR-1263             | 1.35 ± 0.40         | 1.09 ± 0.40          |
| hsa-miR-345-5p           | 1.34 ± 0.43         | 1.01 ± 0.36          |
| hsa-miR-502-3p           | 1.33 ± 0.47         | 1.08 ± 0.31          |
| hsa-miR-6727-3p          | 1.32 ± 0.35         | 1.22 ± 0.40          |
| hsa-miR-6510-5p          | 1.32 ± 0.23         | 1.38 ± 0.41          |
| hsa-miR-222-3p           | 1.31 ± 0.73         | 1.05 ± 0.78          |
| hsa-miR-3937             | 1.30 ± 0.54         | 1.51 ± 0.39          |
| hsa-miR-1234-3p          | 1.29 ± 0.45         | 1.18 ± 0.39          |
| hsa-miR-548ae            | 1.29 ± 0.38         | 0.98 ± 0.24          |
| hsa-miR-6797-3p          | 1.29 ± 0.35         | 1.22 ± 0.47          |
| hsa-miR-532-5p           | 1.28 ± 0.36         | 0.95 ± 0.29          |
| hsa-miR-7154-5p          | 1.28 ± 0.16         | 1.17 ± 0.19          |
| hsa-miR-744-5p           | 1.27 ± 0.55         | 1.23 ± 0.58          |
| hsa-miR-3162-5p          | 1.27 ± 0.31         | 1.18 ± 0.29          |
| hsa-miR-1225-5p          | 1.26 ± 0.64         | 1.48 ± 0.78          |
| hsa-miR-6757-5p          | 1.26 ± 0.28         | 1.12 ± 0.39          |
| hsa-miR-6766-3p          | 1.25 ± 0.28         | 1.18 ± 0.30          |
| hsa-miR-382-5p           | 1.24 ± 0.69         | 0.95 ± 0.25          |
| hsa-miR-6075             | 1.24 ± 0.40         | 1.20 ± 0.24          |
| hsa-miR-4717-3p          | 1.24 ± 0.24         | 1.34 ± 0.37          |

|                  |             |             |
|------------------|-------------|-------------|
| hsa-miR-6892-3p  | 1.24 ± 0.21 | 1.37 ± 0.33 |
| hsa-miR-6785-3p  | 1.23 ± 0.32 | 1.30 ± 0.31 |
| hsa-miR-6879-3p  | 1.23 ± 0.23 | 1.13 ± 0.26 |
| hsa-miR-6800-3p  | 1.22 ± 0.50 | 1.37 ± 0.42 |
| hsa-miR-6880-3p  | 1.22 ± 0.49 | 1.12 ± 0.29 |
| hsa-let-7f-1-3p  | 1.22 ± 0.44 | 0.86 ± 0.29 |
| hsa-miR-4529-3p  | 1.22 ± 0.39 | 1.30 ± 0.20 |
| hsa-miR-4323     | 1.22 ± 0.26 | 1.11 ± 0.27 |
| hsa-miR-1306-5p  | 1.21 ± 0.37 | 1.10 ± 0.26 |
| hsa-miR-6737-3p  | 1.21 ± 0.14 | 1.26 ± 0.21 |
| hsa-miR-192-5p   | 1.20 ± 0.47 | 1.09 ± 0.57 |
| hsa-miR-574-3p   | 1.20 ± 0.43 | 1.05 ± 0.35 |
| hsa-miR-629-5p   | 1.19 ± 0.37 | 1.19 ± 0.50 |
| hsa-miR-6824-5p  | 1.19 ± 0.29 | 1.47 ± 0.46 |
| hsa-miR-1249     | 1.18 ± 0.37 | 1.17 ± 0.19 |
| hsa-miR-1260a    | 1.18 ± 0.22 | 1.01 ± 0.30 |
| hsa-miR-4722-3p  | 1.17 ± 0.17 | 1.50 ± 0.36 |
| hsa-miR-194-5p   | 1.16 ± 0.61 | 1.10 ± 0.70 |
| hsa-miR-4690-5p  | 1.16 ± 0.30 | 1.43 ± 0.31 |
| hsa-miR-6879-5p  | 1.16 ± 0.26 | 1.48 ± 0.47 |
| hsa-miR-548x-3p  | 1.16 ± 0.17 | 1.09 ± 0.29 |
| hsa-miR-27b-3p   | 1.15 ± 0.39 | 0.90 ± 0.52 |
| hsa-miR-7975     | 1.15 ± 0.34 | 0.91 ± 0.30 |
| hsa-miR-3679-5p  | 1.15 ± 0.33 | 1.21 ± 0.22 |
| hsa-miR-7845-5p  | 1.15 ± 0.20 | 1.16 ± 0.19 |
| hsa-miR-1272     | 1.14 ± 0.33 | 1.03 ± 0.37 |
| hsa-miR-3945     | 1.13 ± 0.38 | 1.01 ± 0.30 |
| hsa-miR-642a-3p  | 1.13 ± 0.27 | 0.95 ± 0.28 |
| hsa-miR-6778-5p  | 1.13 ± 0.27 | 1.14 ± 0.31 |
| hsa-miR-503-5p   | 1.12 ± 0.37 | 1.27 ± 0.35 |
| hsa-miR-3201     | 1.12 ± 0.35 | 0.95 ± 0.18 |
| hsa-miR-6511a-3p | 1.12 ± 0.27 | 1.10 ± 0.33 |
| hsa-miR-210-3p   | 1.11 ± 0.43 | 1.14 ± 0.39 |
| hsa-miR-6802-5p  | 1.11 ± 0.38 | 1.32 ± 0.50 |
| hsa-miR-4440     | 1.10 ± 0.14 | 1.36 ± 0.30 |
| hsa-miR-548aj-3p | 1.09 ± 0.21 | 1.20 ± 0.38 |
| hsa-miR-4253     | 1.08 ± 0.33 | 1.24 ± 0.50 |
| hsa-miR-1298-3p  | 1.08 ± 0.21 | ND          |
| hsa-miR-30a-5p   | 1.07 ± 0.51 | 0.82 ± 0.32 |
| hsa-miR-10b-5p   | 1.07 ± 0.22 | 1.08 ± 0.17 |
| hsa-miR-5681a    | 1.06 ± 0.28 | 1.25 ± 0.25 |
| hsa-miR-6790-5p  | 1.05 ± 0.36 | 1.01 ± 0.34 |
| hsa-miR-584-3p   | 1.05 ± 0.29 | 1.47 ± 0.43 |
| hsa-miR-664a-3p  | 1.05 ± 0.25 | 1.11 ± 0.26 |
| hsa-miR-4776-5p  | 1.05 ± 0.23 | 1.00 ± 0.36 |
| hsa-miR-7106-3p  | 1.05 ± 0.15 | 1.02 ± 0.39 |
| hsa-miR-548ac    | 1.04 ± 0.20 | 1.05 ± 0.26 |

|                   |             |             |
|-------------------|-------------|-------------|
| hsa-miR-6127      | 1.04 ± 0.16 | 1.43 ± 0.44 |
| hsa-miR-6849-5p   | 1.03 ± 0.28 | 1.22 ± 0.25 |
| hsa-miR-145-5p    | 1.02 ± 0.44 | 0.88 ± 0.46 |
| hsa-miR-1323      | 1.02 ± 0.30 | 1.03 ± 0.37 |
| hsa-miR-4743-5p   | 1.02 ± 0.27 | 1.07 ± 0.38 |
| hsa-miR-7977      | 1.00 ± 0.35 | 1.03 ± 0.29 |
| hsa-miR-6826-5p   | 1.00 ± 0.21 | 0.99 ± 0.28 |
| hsa-miR-8084      | 1.00 ± 0.17 | 0.91 ± 0.19 |
| hsa-miR-616-5p    | 0.99 ± 0.31 | 1.00 ± 0.25 |
| hsa-miR-4486      | 0.99 ± 0.27 | 1.45 ± 0.43 |
| hsa-miR-550a-3-5p | 0.98 ± 0.33 | 0.79 ± 0.34 |
| hsa-miR-584-5p    | 0.98 ± 0.33 | 1.27 ± 0.59 |
| hsa-miR-340-5p    | 0.98 ± 0.28 | 0.97 ± 0.21 |
| hsa-miR-4781-3p   | 0.98 ± 0.25 | 1.00 ± 0.22 |
| hsa-miR-3944-5p   | 0.96 ± 0.29 | 0.90 ± 0.30 |
| hsa-miR-4780      | 0.96 ± 0.27 | 0.94 ± 0.21 |
| hsa-miR-4299      | 0.96 ± 0.23 | 1.19 ± 0.35 |
| hsa-miR-550b-2-5p | 0.96 ± 0.22 | 0.97 ± 0.27 |
| hsa-miR-1236-3p   | 0.95 ± 0.20 | 0.99 ± 0.19 |
| hsa-miR-376c-3p   | 0.95 ± 0.18 | 0.99 ± 0.23 |
| hsa-miR-19a-3p    | 0.94 ± 0.41 | 0.92 ± 0.27 |
| hsa-miR-374a-5p   | 0.94 ± 0.21 | ND          |
| hsa-miR-2392      | 0.93 ± 0.32 | 1.23 ± 0.37 |
| hsa-miR-4430      | 0.93 ± 0.30 | 1.00 ± 0.29 |
| hsa-miR-4797-5p   | 0.93 ± 0.30 | 0.92 ± 0.20 |
| hsa-miR-7111-5p   | ND          | 1.15 ± 0.36 |
| hsa-miR-3667-3p   | 0.91 ± 0.18 | 0.84 ± 0.24 |
| hsa-miR-3605-3p   | 0.90 ± 0.18 | 0.93 ± 0.30 |
| hsa-miR-769-5p    | 0.89 ± 0.22 | 0.90 ± 0.23 |
| hsa-miR-573       | 0.89 ± 0.19 | 0.92 ± 0.21 |
| hsa-miR-4672      | 0.89 ± 0.17 | 0.96 ± 0.25 |
| hsa-miR-4756-3p   | 0.88 ± 0.27 | 0.97 ± 0.16 |
| hsa-miR-3688-3p   | 0.88 ± 0.15 | 0.93 ± 0.23 |
| hsa-miR-6783-5p   | 0.87 ± 0.24 | 0.92 ± 0.16 |
| hsa-miR-4720-3p   | 0.87 ± 0.19 | 0.93 ± 0.14 |
| hsa-miR-4476      | 0.84 ± 0.14 | 0.98 ± 0.38 |
| hsa-miR-8059      | 0.83 ± 0.28 | 1.00 ± 0.28 |
| hsa-miR-6505-3p   | 0.83 ± 0.21 | 0.79 ± 0.09 |
| hsa-miR-4511      | 0.83 ± 0.17 | 0.86 ± 0.25 |
| hsa-miR-6871-5p   | 0.82 ± 0.22 | 0.93 ± 0.25 |
| hsa-miR-28-5p     | 0.82 ± 0.21 | 0.91 ± 0.17 |
| hsa-miR-4800-5p   | ND          | 0.96 ± 0.24 |
| hsa-miR-548ag     | 0.82 ± 0.13 | 0.95 ± 0.15 |
| hsa-miR-3193      | 0.79 ± 0.25 | 0.84 ± 0.25 |
| hsa-miR-1279      | 0.78 ± 0.31 | 0.78 ± 0.15 |
| hsa-miR-6721-5p   | 0.73 ± 0.22 | 0.99 ± 0.30 |
| hsa-miR-633       | 0.69 ± 0.09 | 0.88 ± 0.23 |
