# Supplementary material for: Differences in circulating microRNA signature in Prader–Willi syndrome and non-syndromic obesity
Source: PubMed Central journal article supplement — Endocr Connect. 2018 Oct 8;7(12):1262–74. doi: 10.1530/EC-18-0329 (PMC6240145; doi:10.1530/ec-18-0329), 2018-10-08
Supplement: EC-18-0329-t002.pdf [file EC-18-0329-t002.pdf]

**Table S2.** Circulating miRNA expression in OB and PWS subjects

| III quantile serum miRNAs |                     |                      |
|---------------------------|---------------------|----------------------|
| miRNA ID                  | Log2 avg. signal OB | Log2 avg. Signal PWS |
| hsa-miR-4499              | 0.92 ± 0.14         | 0.90 ± 0.23          |
| hsa-miR-4786-3p           | 0.92 ± 0.21         | 1.01 ± 0.19          |
| hsa-miR-548ar-5p          | 0.97 ± 0.23         | 0.95 ± 0.20          |
| hsa-miR-378i              | 0.97 ± 0.25         | 1.20 ± 0.34          |
| hsa-miR-6715a-3p          | 0.99 ± 0.25         | 0.99 ± 0.26          |
| hsa-miR-6124              | 1.00 ± 0.36         | 1.23 ± 0.45          |
| hsa-miR-6861-3p           | 1.03 ± 0.40         | 1.03 ± 0.29          |
| hsa-miR-378f              | 1.06 ± 0.22         | 1.23 ± 0.44          |
| hsa-miR-1825              | 1.15 ± 0.27         | 1.30 ± 0.33          |
| hsa-miR-378c              | 1.21 ± 0.23         | 1.31 ± 0.56          |
| hsa-miR-297               | 1.22 ± 0.35         | 1.48 ± 0.60          |
| hsa-miR-6870-5p           | 1.22 ± 0.41         | 1.29 ± 0.47          |
| hsa-miR-6865-5p           | 1.25 ± 0.20         | 1.78 ± 0.40          |
| hsa-miR-6889-3p           | 1.25 ± 0.28         | 1.07 ± 0.25          |
| hsa-miR-1587              | 1.25 ± 0.42         | 1.28 ± 0.43          |
| hsa-miR-6763-5p           | 1.28 ± 0.41         | 1.52 ± 0.33          |
| hsa-miR-532-3p            | 1.33 ± 0.32         | 1.29 ± 0.33          |
| hsa-miR-6782-5p           | 1.34 ± 0.30         | 1.70 ± 0.71          |
| hsa-miR-7114-3p           | 1.35 ± 0.40         | 1.53 ± 0.39          |
| hsa-miR-23a-5p            | 1.37 ± 0.64         | 1.32 ± 0.47          |
| hsa-miR-2277-5p           | 1.40 ± 0.44         | 1.89 ± 0.57          |
| hsa-miR-6716-5p           | 1.40 ± 0.45         | 1.37 ± 0.54          |
| hsa-miR-197-3p            | 1.41 ± 0.25         | 1.23 ± 0.20          |
| hsa-miR-7847-3p           | 1.41 ± 0.29         | 1.31 ± 0.56          |
| hsa-miR-4274              | 1.41 ± 0.39         | 1.55 ± 0.42          |
| hsa-miR-4793-3p           | 1.42 ± 0.51         | 1.39 ± 0.44          |
| hsa-miR-8071              | 1.43 ± 0.33         | 1.42 ± 0.57          |
| hsa-miR-4433b-5p          | 1.44 ± 0.36         | 1.56 ± 0.39          |
| hsa-miR-1180-5p           | 1.44 ± 0.38         | 1.52 ± 0.42          |
| hsa-miR-4632-5p           | 1.47 ± 0.50         | 2.00 ± 0.57          |
| hsa-miR-1224-3p           | 1.47 ± 0.53         | 1.41 ± 0.50          |
| hsa-miR-150-5p            | 1.52 ± 0.52         | 1.20 ± 0.76          |
| hsa-miR-4492              | 1.54 ± 0.73         | 2.26 ± 1.06          |
| hsa-miR-29a-3p            | 1.54 ± 1.03         | 1.05 ± 0.67          |
| hsa-miR-4649-5p           | 1.56 ± 0.43         | 1.83 ± 0.89          |
| hsa-miR-4433-5p           | 1.56 ± 0.44         | 1.51 ± 0.37          |
| hsa-miR-134-5p            | 1.56 ± 0.60         | 1.44 ± 0.67          |
| hsa-miR-4695-5p           | 1.58 ± 0.59         | 1.69 ± 0.73          |
| hsa-miR-6511b-3p          | 1.59 ± 0.37         | 1.40 ± 0.35          |
| hsa-miR-668-5p            | 1.61 ± 0.46         | 2.02 ± 0.58          |
| hsa-miR-6793-3p           | 1.61 ± 0.58         | 1.51 ± 0.34          |
| hsa-miR-3197              | 1.65 ± 0.46         | 2.10 ± 1.10          |
| hsa-miR-1268b             | 1.67 ± 0.53         | 1.85 ± 0.57          |
| hsa-miR-6805-3p           | 1.74 ± 0.47         | 1.63 ± 0.45          |

|                 |             |             |
|-----------------|-------------|-------------|
| hsa-miR-30d-5p  | 1.74 ± 0.95 | 1.49 ± 0.74 |
| hsa-miR-451a    | 2.04 ± 1.36 | 1.61 ± 1.51 |
| hsa-miR-23b-3p  | 2.23 ± 1.43 | 1.51 ± 1.29 |
| hsa-miR-223-3p  | 2.39 ± 1.52 | 1.36 ± 1.29 |
| hsa-miR-151a-5p | 2.48 ± 1.41 | 1.37 ± 1.01 |
| hsa-miR-361-5p  | 2.63 ± 1.61 | 1.47 ± 0.99 |
| hsa-miR-25-3p   | 2.84 ± 1.75 | 1.63 ± 1.33 |
| hsa-miR-20a-5p  | 3.00 ± 2.20 | 1.41 ± 1.60 |
| hsa-miR-26a-5p  | 3.28 ± 2.59 | 1.67 ± 1.61 |
| hsa-miR-106a-5p | 3.65 ± 1.96 | 1.93 ± 1.76 |
