# Supplementary material for: Differences in circulating microRNA signature in Prader–Willi syndrome and non-syndromic obesity
Source: PubMed Central journal article supplement — Endocr Connect. 2018 Oct 8;7(12):1262–74. doi: 10.1530/EC-18-0329 (PMC6240145; doi:10.1530/ec-18-0329), 2018-10-08
Supplement: EC-18-0329-t003.pdf [file EC-18-0329-t003.pdf]

**Table S3.** Circulating miRNA expression in OB and PWS subjects

| IV quantile serum miRNAs |                     |                      |
|--------------------------|---------------------|----------------------|
| miRNA ID                 | Log2 avg. signal OB | Log2 avg. signal PWS |
| hsa-miR-3148             | 0.96 ± 0.24         | 1.00 ± 0.35          |
| hsa-miR-548a-3p          | 1.25 ± 0.36         | 1.26 ± 0.43          |
| hsa-miR-1268a            | 1.27 ± 0.46         | 2.21 ± 0.95          |
| hsa-miR-6780b-5p         | 1.34 ± 0.37         | 1.45 ± 0.45          |
| hsa-miR-6779-5p          | 1.37 ± 0.52         | 1.99 ± 0.60          |
| hsa-miR-4454             | 1.39 ± 0.62         | 1.09 ± 0.43          |
| hsa-miR-6132             | 1.41 ± 0.34         | 1.84 ± 0.46          |
| hsa-miR-4258             | 1.44 ± 0.42         | 1.56 ± 0.21          |
| hsa-miR-5094             | 1.48 ± 0.49         | 1.30 ± 0.32          |
| hsa-miR-337-3p           | 1.54 ± 0.58         | 1.32 ± 0.46          |
| hsa-miR-1233-5p          | 1.56 ± 0.29         | 1.89 ± 0.47          |
| hsa-miR-371b-5p          | 1.58 ± 0.40         | 1.40 ± 0.37          |
| hsa-miR-3162-3p          | 1.60 ± 0.57         | 1.74 ± 0.44          |
| hsa-miR-3619-5p          | 1.71 ± 0.49         | 1.90 ± 0.46          |
| hsa-miR-2110             | 1.75 ± 0.51         | 1.42 ± 0.29          |
| hsa-miR-320e             | 1.75 ± 0.73         | 2.83 ± 0.93          |
| hsa-miR-4433-3p          | 1.78 ± 0.58         | 1.71 ± 0.49          |
| hsa-miR-130b-3p          | 1.84 ± 0.75         | 1.84 ± 0.74          |
| hsa-miR-6722-3p          | 1.86 ± 0.61         | 2.61 ± 0.93          |
| hsa-miR-483-5p           | 1.88 ± 0.57         | 2.32 ± 1.04          |
| hsa-miR-221-3p           | 1.89 ± 0.69         | 2.00 ± 0.94          |
| hsa-miR-6771-5p          | 1.93 ± 0.59         | 1.94 ± 0.65          |
| hsa-miR-4689             | 2.01 ± 0.74         | 1.41 ± 0.64          |
| hsa-miR-4674             | 2.02 ± 0.57         | 1.93 ± 0.64          |
| hsa-miR-4750-3p          | 2.05 ± 0.46         | 2.27 ± 0.49          |
| hsa-miR-4758-5p          | 2.05 ± 0.76         | 2.28 ± 0.67          |
| hsa-miR-3621             | 2.12 ± 0.68         | 2.43 ± 1.03          |
| hsa-miR-4459             | 2.19 ± 0.73         | 2.03 ± 0.53          |
| hsa-miR-4651             | 2.19 ± 0.76         | 2.20 ± 0.72          |
| hsa-miR-1343-5p          | 2.22 ± 0.67         | 2.73 ± 0.67          |
| hsa-miR-6798-5p          | 2.33 ± 0.54         | 2.82 ± 0.95          |
| hsa-miR-4734             | 2.33 ± 0.99         | 2.36 ± 0.93          |
| hsa-miR-151a-3p          | 2.39 ± 0.86         | 1.98 ± 0.88          |
| hsa-miR-107              | 2.70 ± 1.62         | 1.44 ± 1.50          |
| hsa-miR-7641             | 2.74 ± 1.49         | 2.37 ± 1.27          |
| hsa-miR-1246             | 2.75 ± 1.34         | 2.38 ± 0.90          |
| hsa-let-7c-5p            | 2.87 ± 1.96         | 1.58 ± 1.21          |
| hsa-miR-146a-5p          | 3.00 ± 1.19         | 1.96 ± 1.23          |
| hsa-miR-19b-3p           | 3.04 ± 1.43         | 1.79 ± 1.62          |
| hsa-miR-106b-5p          | 3.50 ± 1.74         | 1.75 ± 1.45          |
| hsa-miR-17-5p            | 3.65 ± 2.14         | 1.90 ± 1.88          |
| hsa-miR-425-5p           | 3.70 ± 1.47         | 2.27 ± 1.62          |
| hsa-miR-16-5p            | 4.45 ± 3.54         | 2.09 ± 2.49          |
| hsa-miR-93-5p            | 4.52 ± 2.37         | 2.42 ± 1.95          |

hsa-miR-24-3p

5.11 ± 3.00

2.33 ± 2.12
