# Supplementary material for: Differences in circulating microRNA signature in Prader–Willi syndrome and non-syndromic obesity
Source: PubMed Central journal article supplement — Endocr Connect. 2018 Oct 8;7(12):1262–74. doi: 10.1530/EC-18-0329 (PMC6240145; doi:10.1530/ec-18-0329), 2018-10-08
Supplement: EC-18-0329-t004.pdf [file EC-18-0329-t004.pdf]

**Table S4.** Circulating miRNA expression in OB and PWS subjects

| V quantile serum miRNAs |                     |                      |
|-------------------------|---------------------|----------------------|
| miRNA ID                | Log2 avg. signal OB | Log2 avg. signal PWS |
| hsa-miR-320a            | 8.14 ± 0.66         | 8.54 ± 0.64          |
| hsa-miR-320b            | 7.83 ± 0.59         | 8.04 ± 0.70          |
| hsa-miR-7704            | 7.58 ± 0.68         | 7.60 ± 0.64          |
| hsa-miR-3960            | 7.57 ± 0.85         | 7.78 ± 0.68          |
| hsa-miR-4532            | 7.56 ± 0.57         | 8.07 ± 0.69          |
| hsa-miR-3665            | 7.48 ± 0.79         | 7.50 ± 0.51          |
| hsa-miR-6089            | 7.42 ± 0.40         | 7.46 ± 0.60          |
| hsa-miR-320c            | 7.32 ± 0.62         | 7.72 ± 0.65          |
| hsa-miR-4484            | 7.20 ± 1.31         | 7.66 ± 1.38          |
| hsa-miR-6090            | 7.17 ± 0.39         | 7.21 ± 0.51          |
| hsa-miR-4787-5p         | 7.15 ± 0.82         | 7.19 ± 0.42          |
| hsa-miR-6732-5p         | 6.92 ± 0.52         | 7.30 ± 0.50          |
| hsa-miR-6087            | 6.75 ± 0.34         | 7.00 ± 0.44          |
| hsa-miR-6869-5p         | 6.58 ± 0.71         | 6.37 ± 0.39          |
| hsa-miR-6729-5p         | 6.24 ± 0.95         | 6.19 ± 0.68          |
| hsa-miR-6125            | 6.22 ± 0.90         | 6.11 ± 0.90          |
| hsa-miR-92a-3p          | 6.18 ± 2.39         | 4.23 ± 2.11          |
| hsa-miR-4466            | 6.17 ± 0.92         | 6.26 ± 1.08          |
| hsa-miR-122-5p          | 6.15 ± 2.39         | 3.52 ± 1.97          |
| hsa-miR-4487            | 6.15 ± 0.52         | 6.22 ± 0.79          |
| hsa-miR-6088            | 6.12 ± 0.43         | 6.18 ± 0.56          |
| hsa-miR-8069            | 6.10 ± 0.74         | 6.10 ± 0.62          |
| hsa-miR-185-5p          | 6.06 ± 1.67         | 5.63 ± 1.01          |
| hsa-miR-5787            | 6.04 ± 0.31         | 6.74 ± 0.46          |
| hsa-miR-638             | 6.03 ± 0.77         | 6.44 ± 0.45          |
| hsa-miR-1915-3p         | 6.01 ± 0.87         | 6.07 ± 0.64          |
| hsa-miR-486-5p          | 5.97 ± 1.76         | 5.33 ± 1.48          |
| hsa-miR-2861            | 5.91 ± 0.64         | 6.08 ± 0.49          |
| hsa-miR-8075            | 5.91 ± 0.58         | 6.80 ± 0.59          |
| hsa-miR-4497            | 5.68 ± 1.09         | 6.87 ± 0.70          |
| hsa-miR-7107-5p         | 5.66 ± 1.59         | 6.38 ± 0.58          |
| hsa-miR-4516            | 5.51 ± 0.56         | 5.55 ± 0.44          |
| hsa-miR-23a-3p          | 5.45 ± 2.59         | 2.99 ± 2.33          |
| hsa-miR-6727-5p         | 5.39 ± 1.06         | 5.66 ± 0.82          |
| hsa-miR-191-5p          | 5.30 ± 2.09         | 3.62 ± 1.81          |
| hsa-miR-6724-5p         | 5.30 ± 0.87         | 5.26 ± 1.02          |
| hsa-let-7b-5p           | 5.29 ± 2.60         | 3.20 ± 1.76          |
| hsa-miR-762             | 5.20 ± 0.55         | 5.62 ± 0.65          |
| hsa-miR-6786-5p         | 5.13 ± 0.75         | 5.56 ± 0.86          |
| hsa-miR-320d            | 5.12 ± 0.88         | 5.79 ± 1.00          |
| hsa-miR-7108-5p         | 5.03 ± 0.87         | 5.14 ± 0.59          |
| hsa-miR-4687-3p         | 4.99 ± 0.53         | 4.73 ± 1.19          |

|                 |             |             |
|-----------------|-------------|-------------|
| hsa-miR-6803-5p | 4.90 ± 0.36 | 5.25 ± 0.59 |
| hsa-miR-3178    | 4.89 ± 0.91 | 6.14 ± 1.89 |
| hsa-miR-5001-5p | 4.77 ± 0.79 | 4.92 ± 0.63 |
| hsa-miR-1237-5p | 4.69 ± 0.68 | 5.45 ± 1.13 |
| hsa-miR-3656    | 4.66 ± 0.83 | 5.17 ± 0.85 |
| hsa-miR-3196    | 4.59 ± 0.99 | 5.08 ± 1.30 |
| hsa-miR-7110-5p | 4.57 ± 1.09 | 5.41 ± 1.16 |
| hsa-miR-4488    | 4.47 ± 1.13 | 4.94 ± 1.21 |
| hsa-miR-1469    | 4.46 ± 0.80 | 4.96 ± 0.46 |
| hsa-miR-8072    | 4.44 ± 1.14 | 4.76 ± 1.55 |
| hsa-miR-6791-5p | 4.38 ± 0.75 | 4.56 ± 1.04 |
| hsa-miR-4281    | 4.16 ± 0.88 | 4.63 ± 1.03 |
| hsa-miR-149-3p  | 4.13 ± 1.06 | 4.40 ± 0.95 |
| hsa-miR-4443    | 4.12 ± 1.00 | 4.17 ± 1.09 |
| hsa-miR-4508    | 4.07 ± 1.00 | 4.66 ± 1.02 |
| hsa-miR-6126    | 4.05 ± 1.01 | 4.81 ± 1.69 |
| hsa-miR-423-5p  | 4.00 ± 0.93 | 3.86 ± 1.43 |
| hsa-miR-6752-5p | 3.98 ± 0.94 | 4.37 ± 1.11 |
| hsa-miR-455-3p  | 3.94 ± 0.76 | 2.96 ± 1.61 |
| hsa-miR-1908-5p | 3.82 ± 1.26 | 4.35 ± 1.36 |
| hsa-miR-6800-5p | 3.82 ± 0.84 | 3.60 ± 0.57 |
| hsa-miR-6068    | 3.77 ± 1.01 | 3.20 ± 0.89 |
| hsa-miR-22-3p   | 3.76 ± 1.14 | 2.91 ± 1.46 |
| hsa-miR-140-3p  | 3.56 ± 1.71 | 2.27 ± 1.12 |
| hsa-miR-4763-3p | 3.55 ± 0.57 | 3.87 ± 0.64 |
| hsa-miR-6850-5p | 3.48 ± 0.75 | 3.77 ± 0.73 |
| hsa-miR-3613-5p | 3.43 ± 1.76 | 4.11 ± 1.19 |
| hsa-miR-4270    | 3.43 ± 0.76 | 3.27 ± 0.57 |
| hsa-miR-6789-5p | 3.41 ± 0.83 | 3.31 ± 0.99 |
| hsa-miR-4707-5p | 3.33 ± 0.52 | 3.79 ± 0.52 |
| hsa-miR-1228-5p | 3.30 ± 0.96 | 3.92 ± 1.27 |
| hsa-miR-4530    | 3.29 ± 0.98 | 1.97 ± 0.64 |
| hsa-miR-3940-5p | 3.28 ± 1.00 | 3.86 ± 0.90 |
| hsa-miR-3620-5p | 3.27 ± 0.79 | 3.55 ± 0.56 |
| hsa-miR-4463    | 3.22 ± 0.86 | 3.11 ± 1.15 |
| hsa-miR-4745-5p | 3.22 ± 0.75 | 3.24 ± 0.87 |
| hsa-miR-1281    | 3.22 ± 0.62 | 2.33 ± 0.85 |
| hsa-miR-4467    | 3.11 ± 1.42 | 4.13 ± 1.37 |
| hsa-miR-378a-3p | 3.11 ± 0.67 | 3.72 ± 0.90 |
| hsa-miR-6858-5p | 3.08 ± 0.83 | 3.21 ± 0.89 |
| hsa-miR-6821-5p | 3.07 ± 1.10 | 3.58 ± 0.91 |
| hsa-miR-193a-5p | 3.07 ± 0.81 | 2.74 ± 1.14 |
| hsa-miR-3921    | 3.06 ± 0.65 | 3.01 ± 0.61 |
| hsa-miR-103a-3p | 3.05 ± 2.05 | 1.84 ± 1.59 |
| hsa-miR-378h    | 3.02 ± 0.56 | 3.03 ± 0.62 |
| hsa-miR-6765-5p | 3.01 ± 0.74 | 3.55 ± 1.00 |
| hsa-miR-663a    | 3.00 ± 0.82 | 3.25 ± 0.89 |

|                  |             |             |
|------------------|-------------|-------------|
| hsa-miR-328-5p   | 2.97 ± 0.57 | 3.40 ± 1.08 |
| hsa-miR-4429     | 2.95 ± 0.84 | 3.99 ± 0.98 |
| hsa-miR-6756-5p  | 2.91 ± 0.75 | 3.60 ± 0.47 |
| hsa-miR-6816-5p  | 2.81 ± 0.61 | 3.78 ± 1.29 |
| hsa-miR-6794-5p  | 2.81 ± 0.55 | 3.52 ± 0.72 |
| hsa-miR-1273g-3p | 2.73 ± 0.91 | 4.16 ± 1.09 |
| hsa-miR-6775-5p  | 2.63 ± 0.86 | 2.89 ± 0.64 |
| hsa-miR-4433b-3p | 2.63 ± 0.72 | 2.79 ± 1.14 |
| hsa-miR-1227-5p  | 2.59 ± 1.06 | 3.31 ± 1.01 |
| hsa-miR-6743-5p  | 2.59 ± 0.99 | 2.47 ± 0.78 |
| hsa-miR-3157-3p  | 2.53 ± 0.91 | 2.12 ± 1.13 |
| hsa-miR-6085     | 2.45 ± 0.56 | 3.40 ± 0.83 |
| hsa-miR-4739     | 2.37 ± 0.51 | 2.30 ± 0.82 |
| hsa-miR-619-5p   | 2.35 ± 0.48 | 3.40 ± 1.09 |
| hsa-miR-6805-5p  | 2.20 ± 0.96 | 3.41 ± 1.14 |
| hsa-miR-4668-5p  | 2.17 ± 1.19 | 2.05 ± 1.07 |
| hsa-miR-4505     | 2.16 ± 1.09 | 2.21 ± 0.90 |
| hsa-miR-6769b-5p | 2.15 ± 0.59 | 2.65 ± 0.60 |
| hsa-miR-6891-5p  | 2.12 ± 0.92 | 2.86 ± 0.73 |
| hsa-miR-1207-5p  | 2.12 ± 0.68 | 2.60 ± 0.54 |
| hsa-miR-6749-5p  | 2.12 ± 0.53 | 2.73 ± 0.59 |
| hsa-miR-3613-3p  | 2.08 ± 1.31 | 2.37 ± 1.24 |
| hsa-miR-937-5p   | 2.05 ± 0.55 | 1.77 ± 0.52 |
| hsa-miR-6750-5p  | 2.04 ± 0.56 | 2.56 ± 0.90 |
| hsa-miR-6511b-5p | 1.96 ± 0.34 | 2.37 ± 0.64 |
| hsa-miR-4706     | 1.88 ± 0.45 | 3.13 ± 1.10 |
| hsa-miR-877-5p   | 1.85 ± 0.42 | 2.28 ± 0.79 |
| hsa-miR-7150     | 1.77 ± 0.80 | 2.59 ± 0.81 |
| hsa-miR-4507     | 1.76 ± 0.52 | 2.22 ± 0.71 |
| hsa-miR-3141     | 1.74 ± 0.68 | 2.30 ± 0.74 |
| hsa-miR-3185     | 1.71 ± 0.35 | 1.76 ± 0.27 |
| hsa-miR-6787-5p  | 1.60 ± 0.38 | 1.95 ± 0.55 |
| hsa-miR-1275     | 1.55 ± 0.51 | 2.26 ± 0.51 |
| hsa-miR-6776-5p  | 1.55 ± 0.40 | 1.54 ± 0.71 |
| hsa-miR-4801     | 0.90 ± 0.29 | 0.94 ± 0.14 |
| hsa-miR-4735-3p  | 0.83 ± 0.17 | 0.99 ± 0.20 |
