# Supplementary figures and images for: Differences in circulating microRNA signature in Prader–Willi syndrome and non-syndromic obesity
Source: PubMed Central journal article supplement — Endocr Connect. 2018 Oct 8;7(12):1262–74. doi: 10.1530/EC-18-0329 (PMC6240145; doi:10.1530/ec-18-0329), 2018-10-08

A.

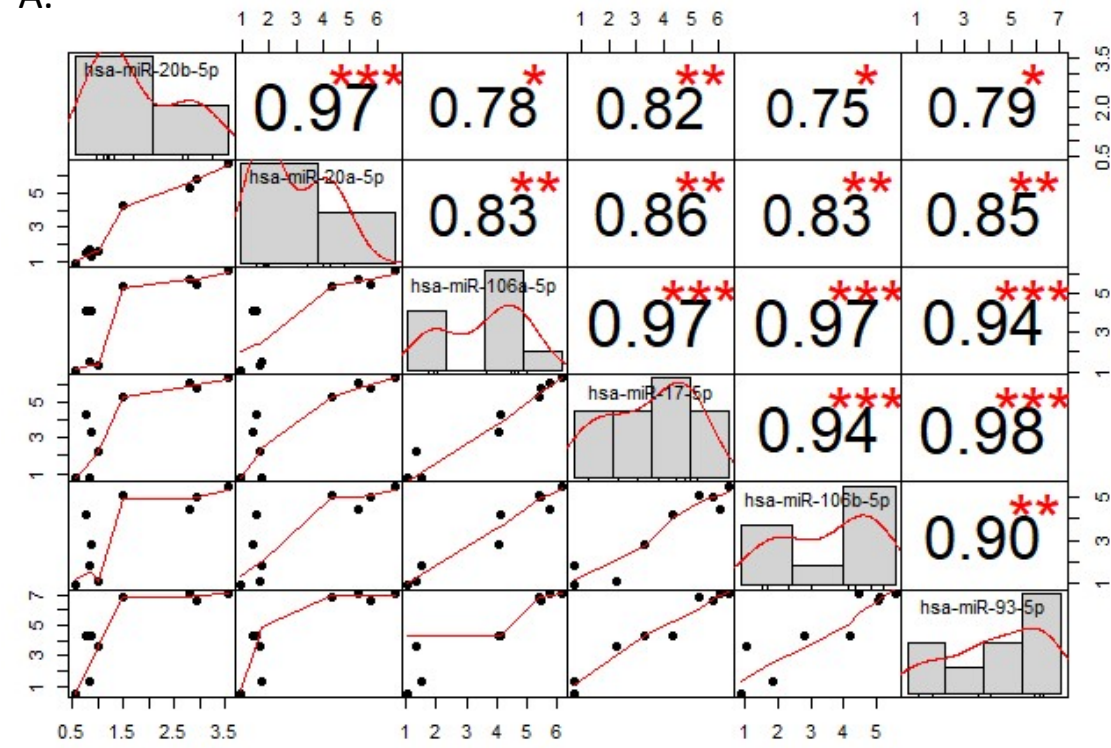

B.

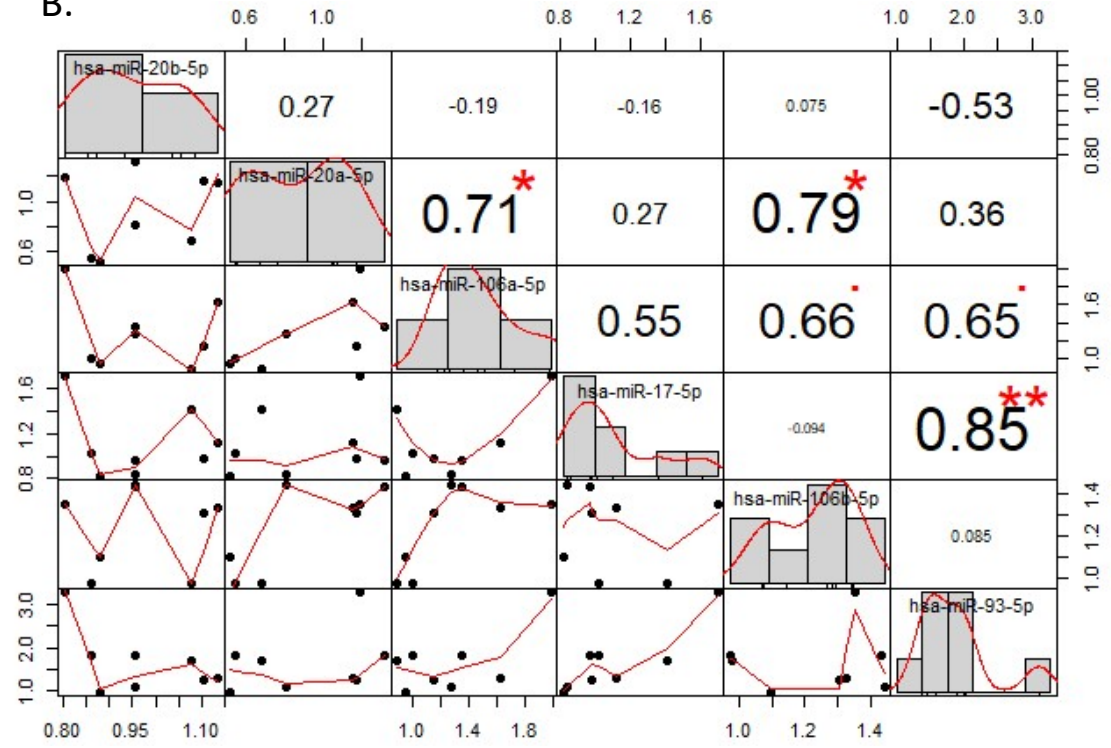

Supplement: EC-18-0329-s001.pdf [file EC-18-0329-s001.pdf]
